# Supplementary material for: Carbamoyl Phosphate Synthase Subunit CgCPS1 Is Necessary for Virulence and to Regulate Stress Tolerance in Colletotrichum gloeosporioides
Source: PubMed Central journal article supplement — Plant Pathol J. 2021 Jun 1;37(3):232–42. doi: 10.5423/PPJ.OA.11.2020.0208 (PMC8200577; doi:10.5423/ppj.oa.11.2020.0208), 2021-06-01
Supplement: PPJ-OA-11-2020-0208-suppl.pdf [file PPJ-OA-11-2020-0208-suppl.pdf]

**Supplementary Table 1.** Strains used in current study

| No. | Strain name       | Description                          |
|-----|-------------------|--------------------------------------|
| 1   | W16               | Wild type                            |
| 2   | S58               | T-DNA Insertional mutant of W16      |
| 3   | $\Delta$ cgcps1-1 | CgCPS1 deletion strain of W16        |
| 4   | $\Delta$ cgcps1-2 | CgCPS1 deletion strain of W16        |
| 5   | CgCPS1-C          | CgCPS1 complementation strain of W16 |

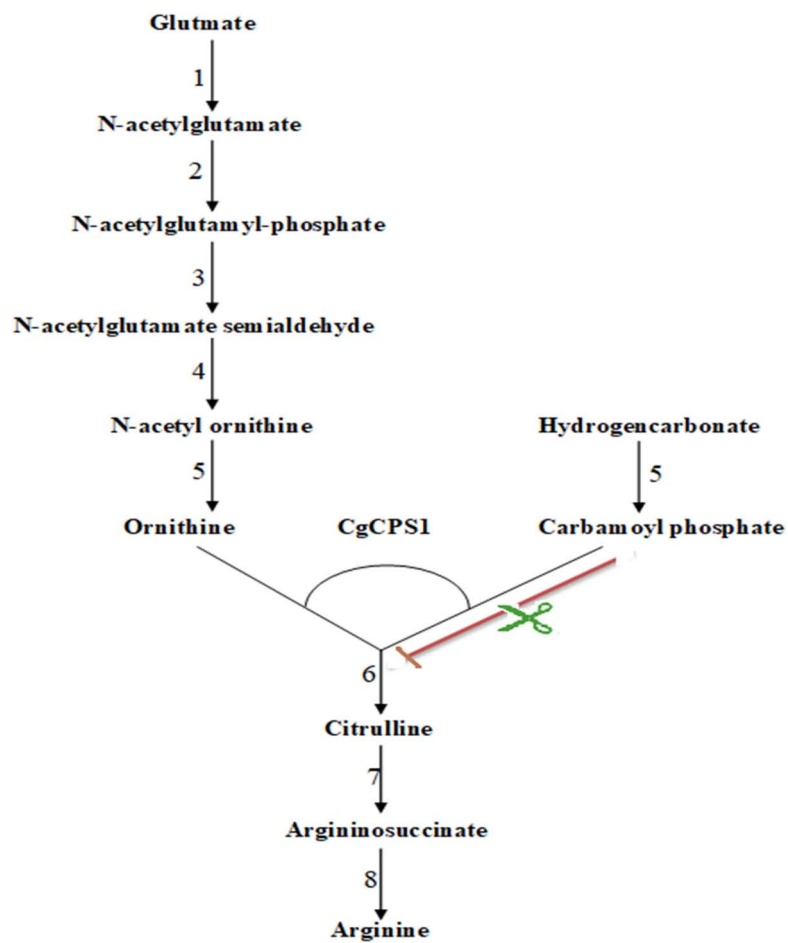

**Supplementary Fig. 1.** The presumed pathway of arginine biosynthesis and targeted gene deletion in *Colletotrichum gloeosporioides*.
